# Supplementary material for: Diazacoronand linked β-cyclodextrin dimer complexes of Brilliant Yellow tetraanion and their sodium(I) analoguesβ-Cyclodextrin = cyclomaltoheptaoseElectronic supplementary information (ESI) available: Molar absorbance and 2D NMR ROESY spectra of 1 and 2, and their complexes with 34–. See http://www.rsc.org/suppdata/ob/b2/b209759c/.
Source: Royal Society of Chemistry journal article supplement (doi:10.1039/b209759c), 2003-02-12
Supplement: b209759c.doc [file b209759c.doc]

**Diazacoronand linked -cyclodextrin† dimer complexes of Brilliant Yellow tetraanion and their sodium(1) analogues‡**

**Lee C. West,*a* Oska Wyness,*a* Bruce L. May,*a* Philip Clements,*a* Stephen F. Lincoln*a** and Christopher J. Easton*b***

*a Department of Chemistry, The University of Adelaide, Adelaide SA 5005, Australia*

*b* Research School of Chemistry, The Australian National University, Canberra, ACT 0002, Australia


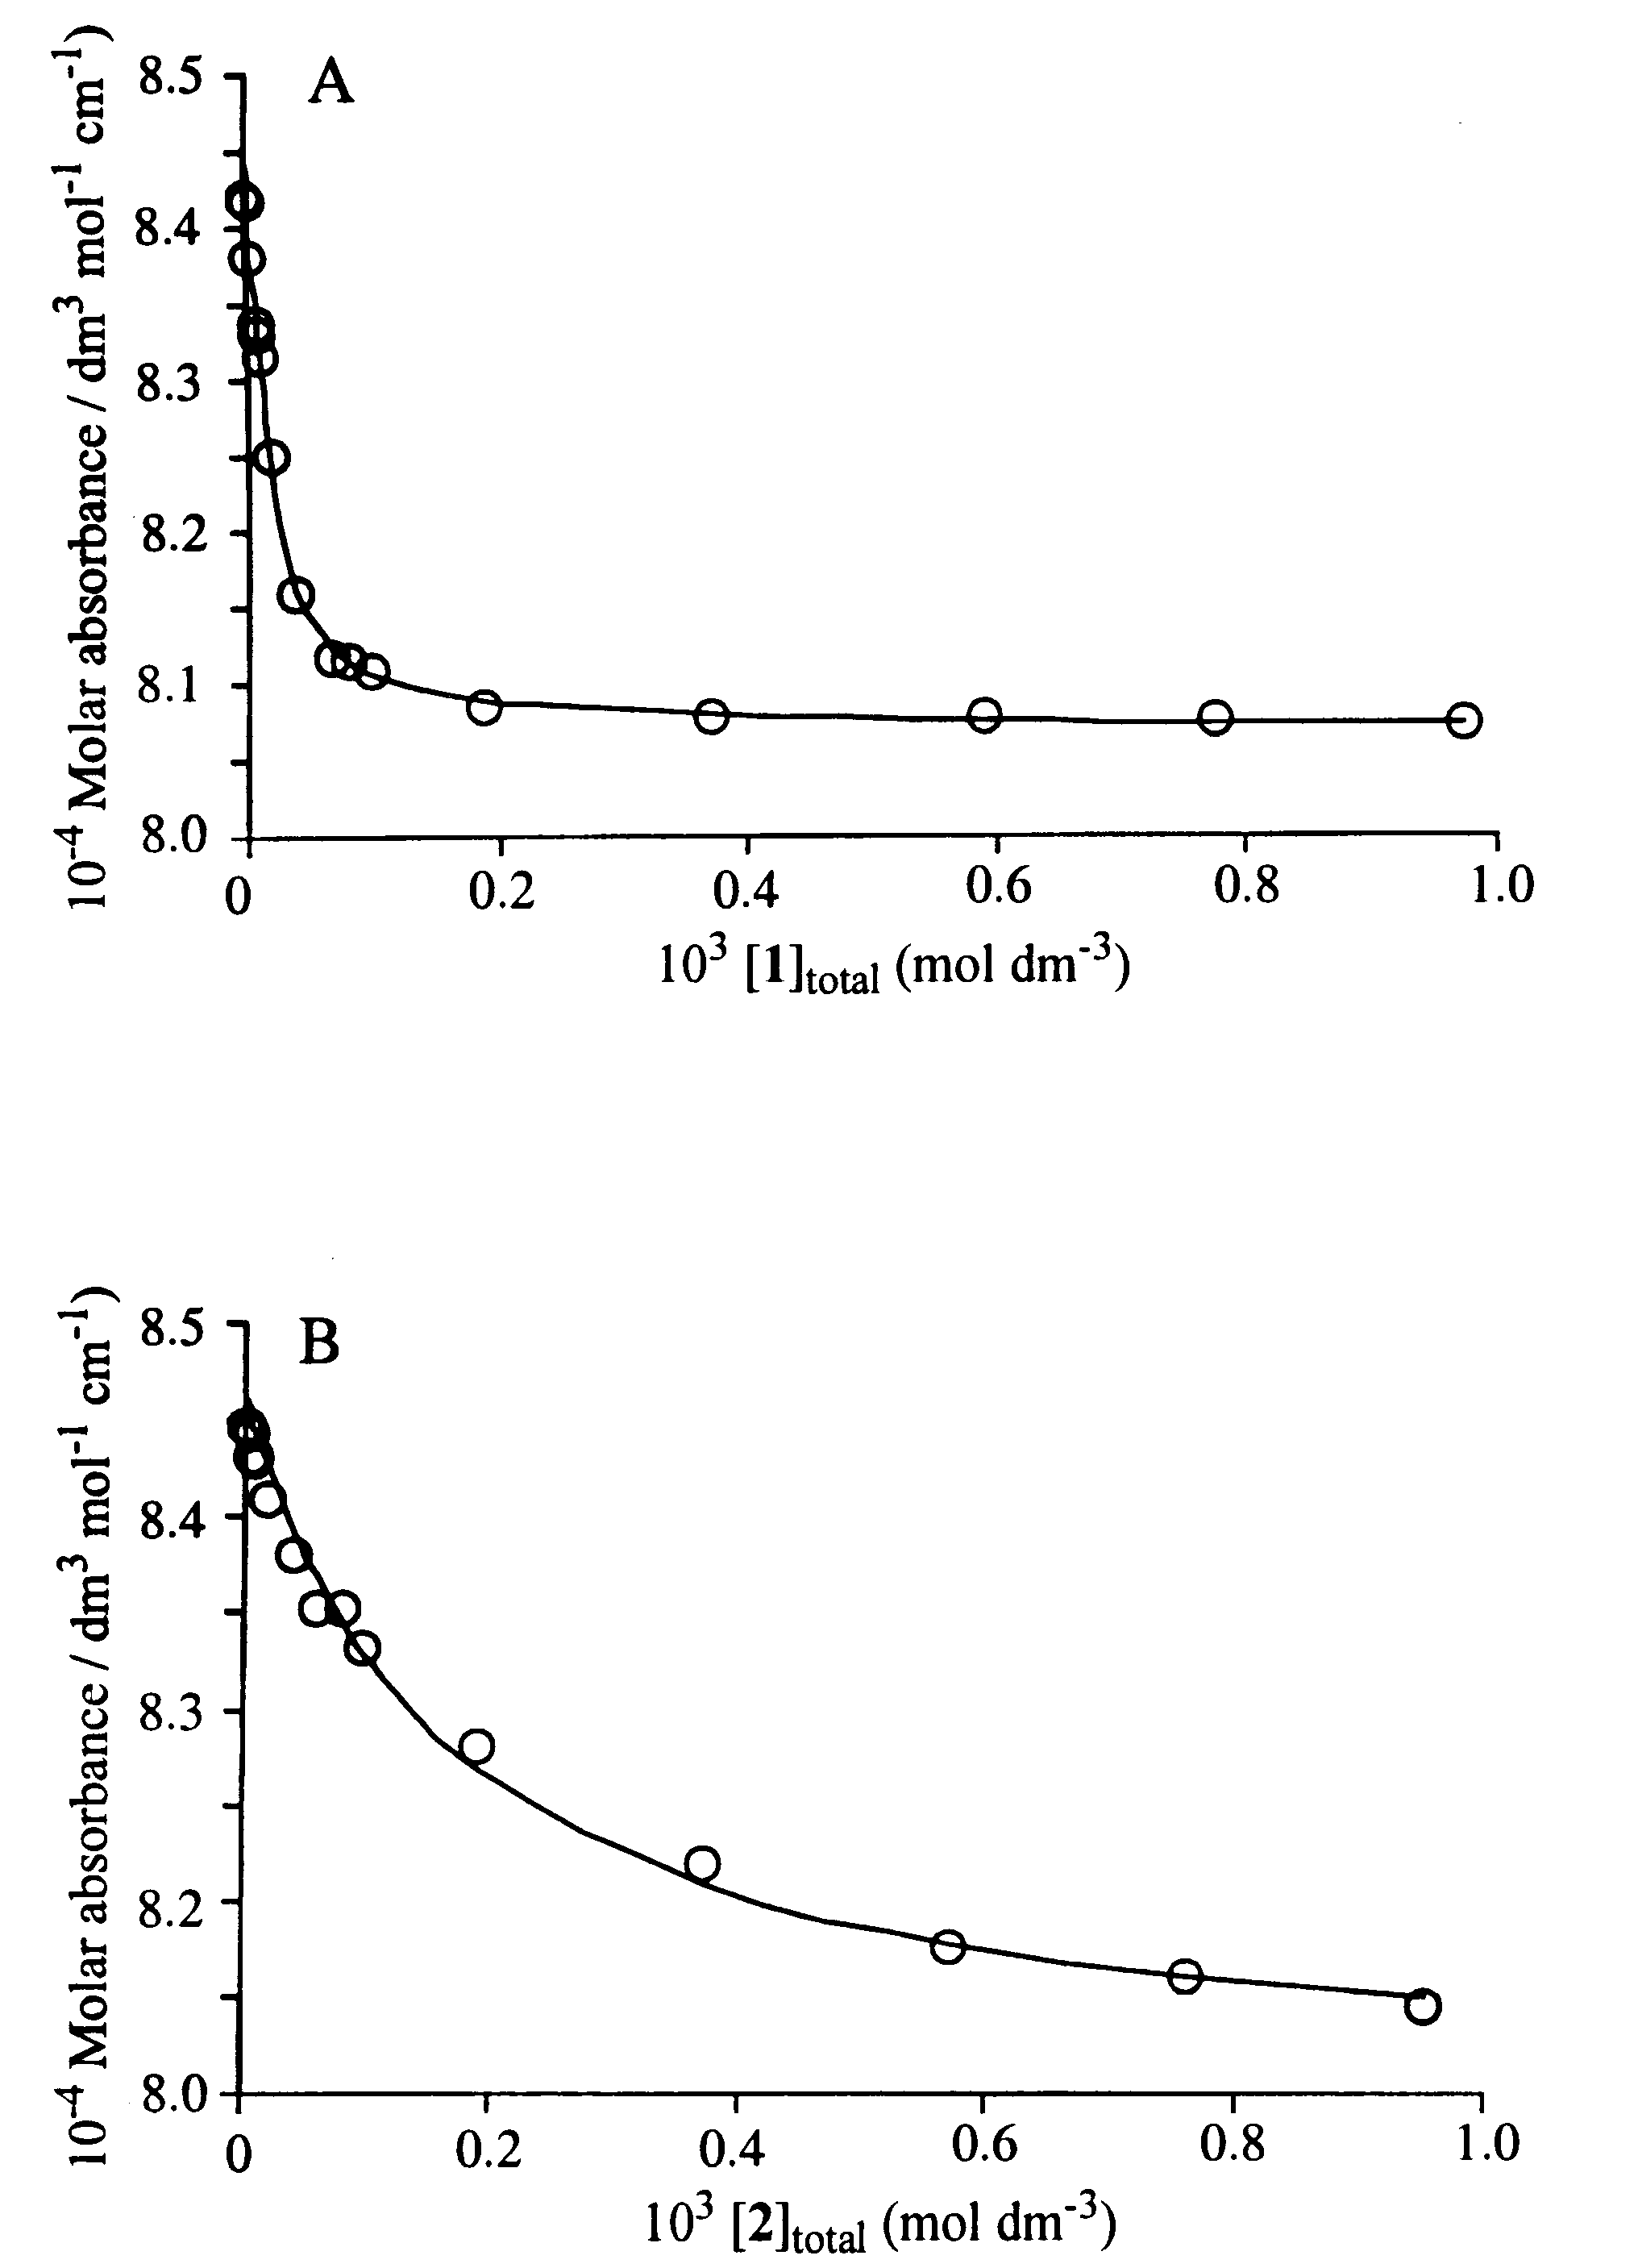


**Fig. S1**. Variations of the molar absorbance of 1.00  10-5 dm3 mol-1 **3**4- at 298.2 K in 0.05 mol dm-3 aqueous B(OH)3/NEt4OH buffer at pH 10.0 and *I* = 0.10 mol dm-3 (NEt4ClO4) at 498 nm in the presence of **1**, A, and at 475 nm in the presence of **2**, B, where in each case the concentration was varied in the range 1.00  10-6 to 1.00  10-3 mol dm‑3. A. The curves represent the best fit of the algorithm for the formation of **1**·**3**4- and **2**·**3**4-, respectively, to molar absorbance data at 1 nm intervals over the ranges 470-520 nm and 480-550 nm, respectively.

**
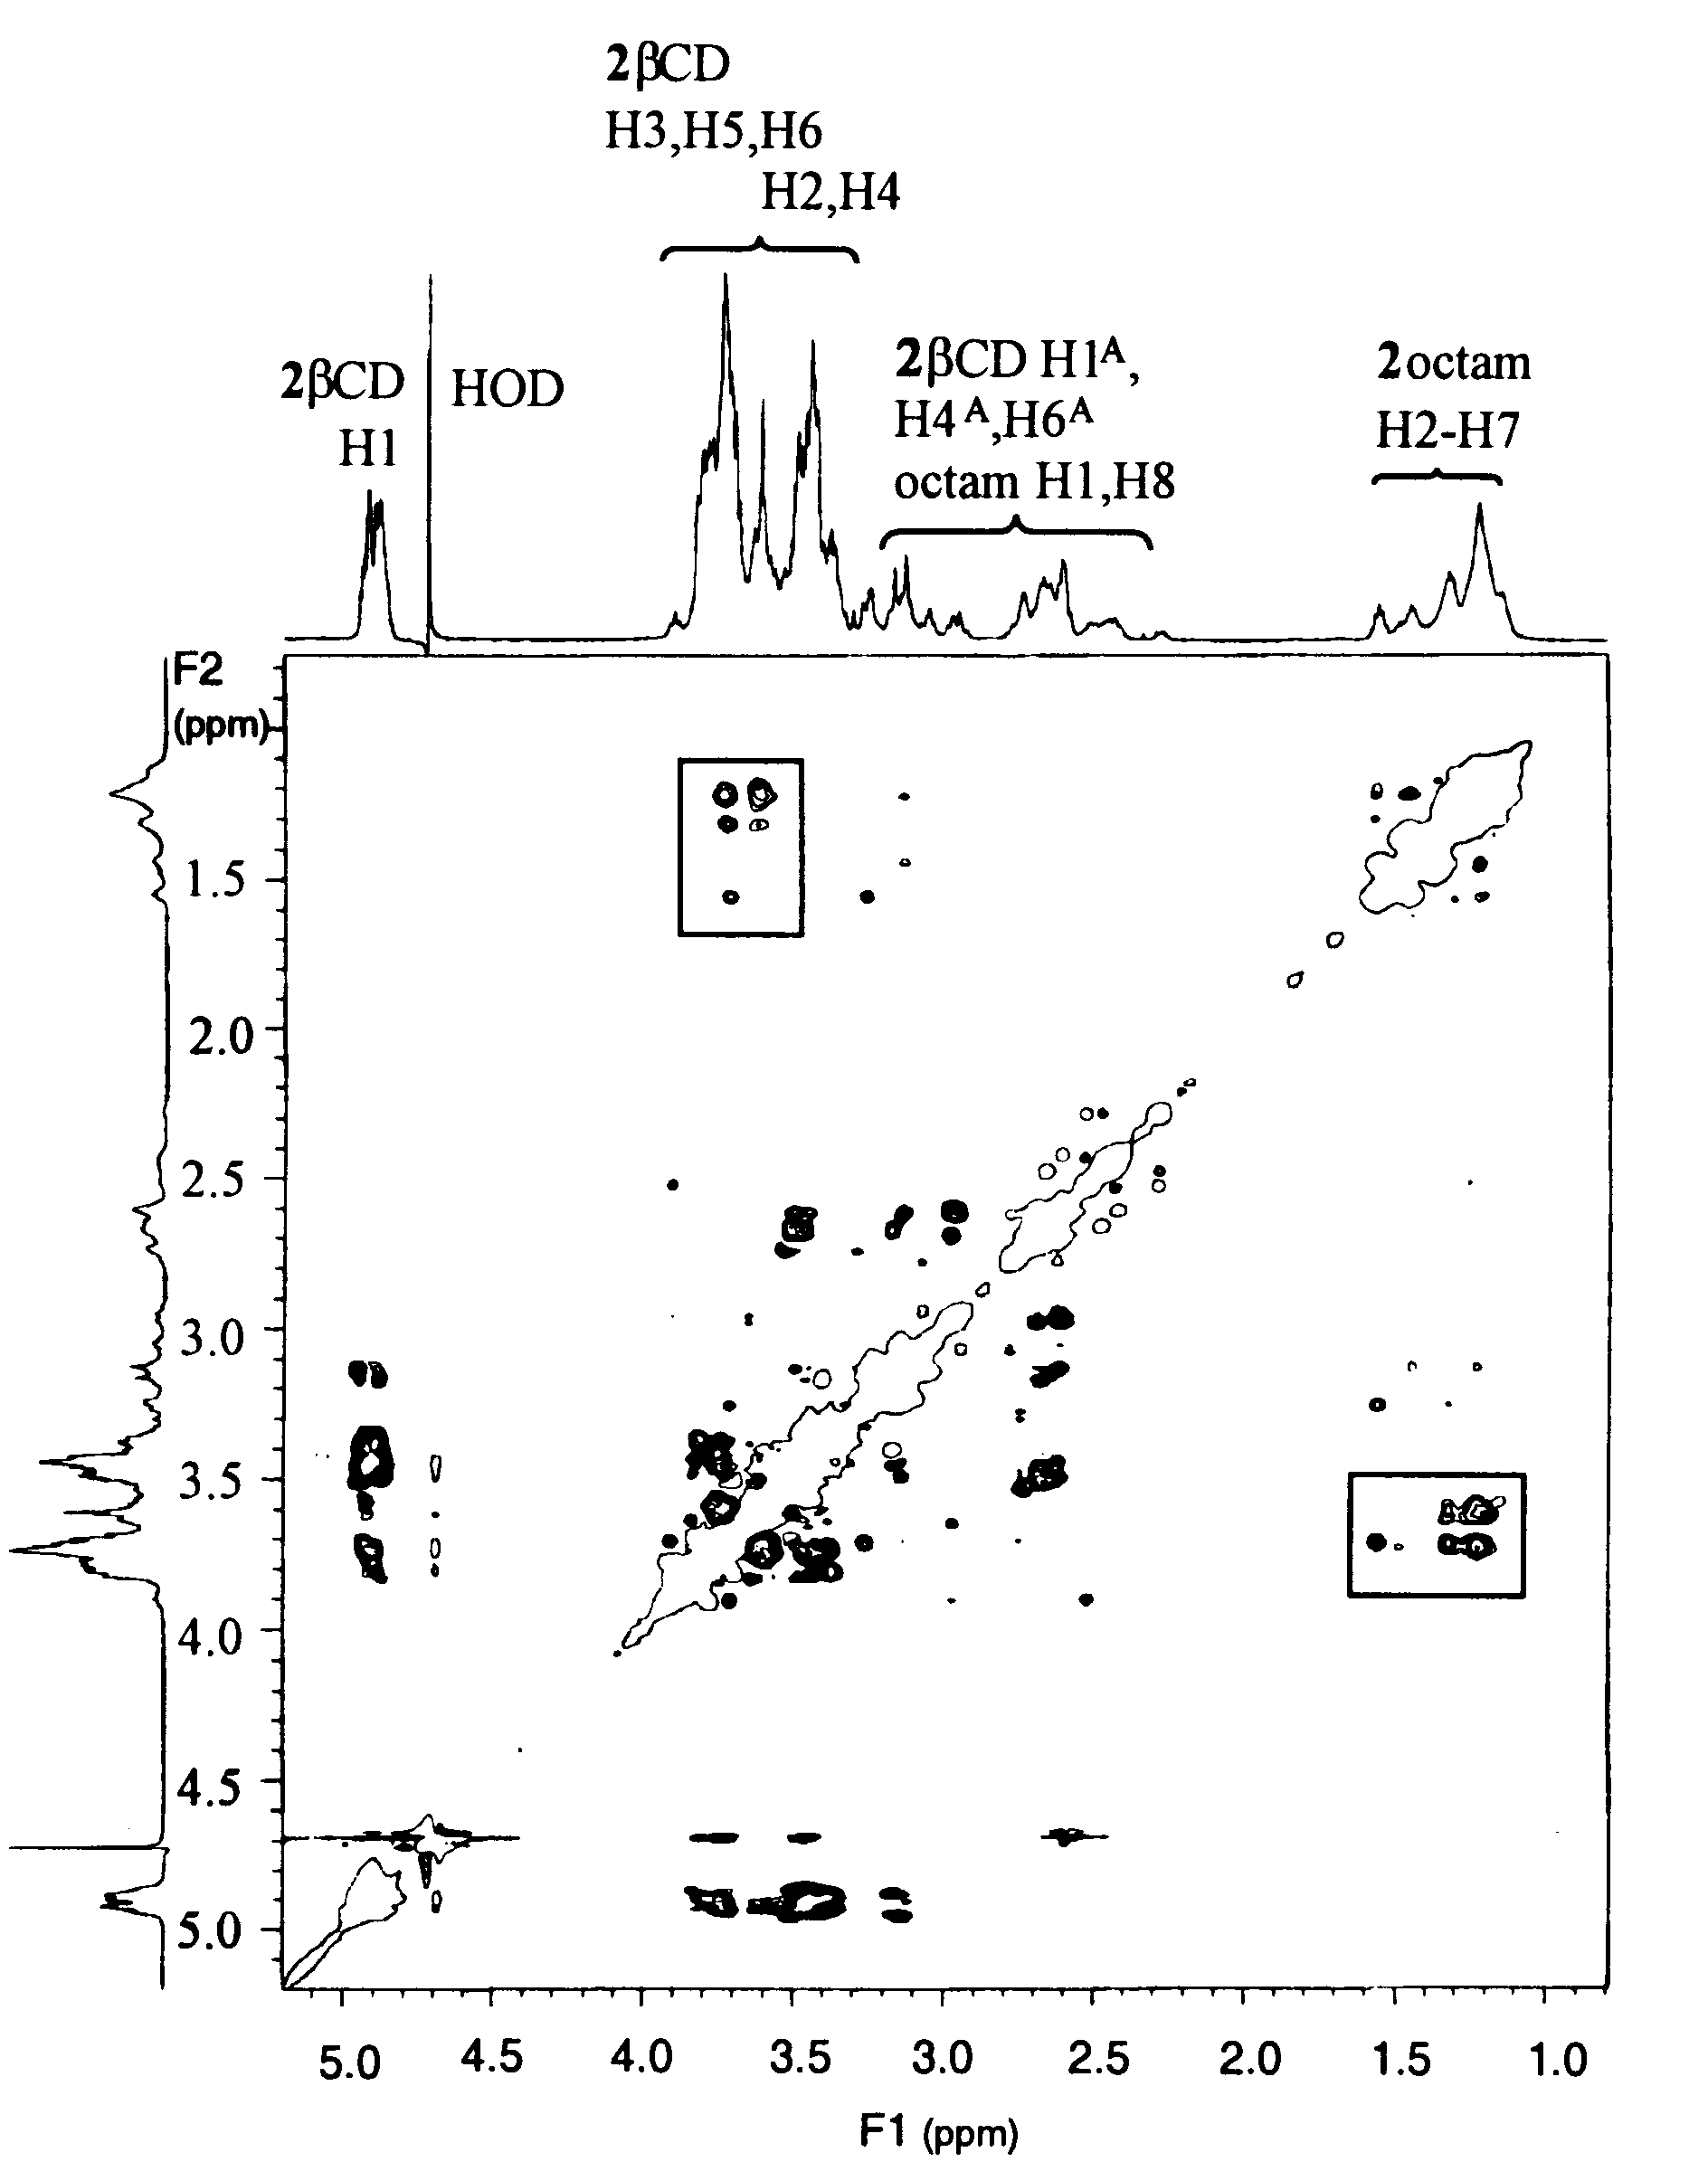
**

**Fig. S2**. The 2D 1H ROESY NMR (600 MHz) spectrum of a D2O solution 0.014 mol dm‑3 in **2** in 10-3 mol dm-3  NaOD and 0.1 mol dm-3 in NaClO4 (pD ≈ 11) at 298.2 K. The rectangles enclose cross-peaks arising from ROE interactions between the H2-H7 protons of the octyl linker units and the CD H3, H5 and H6 protons.


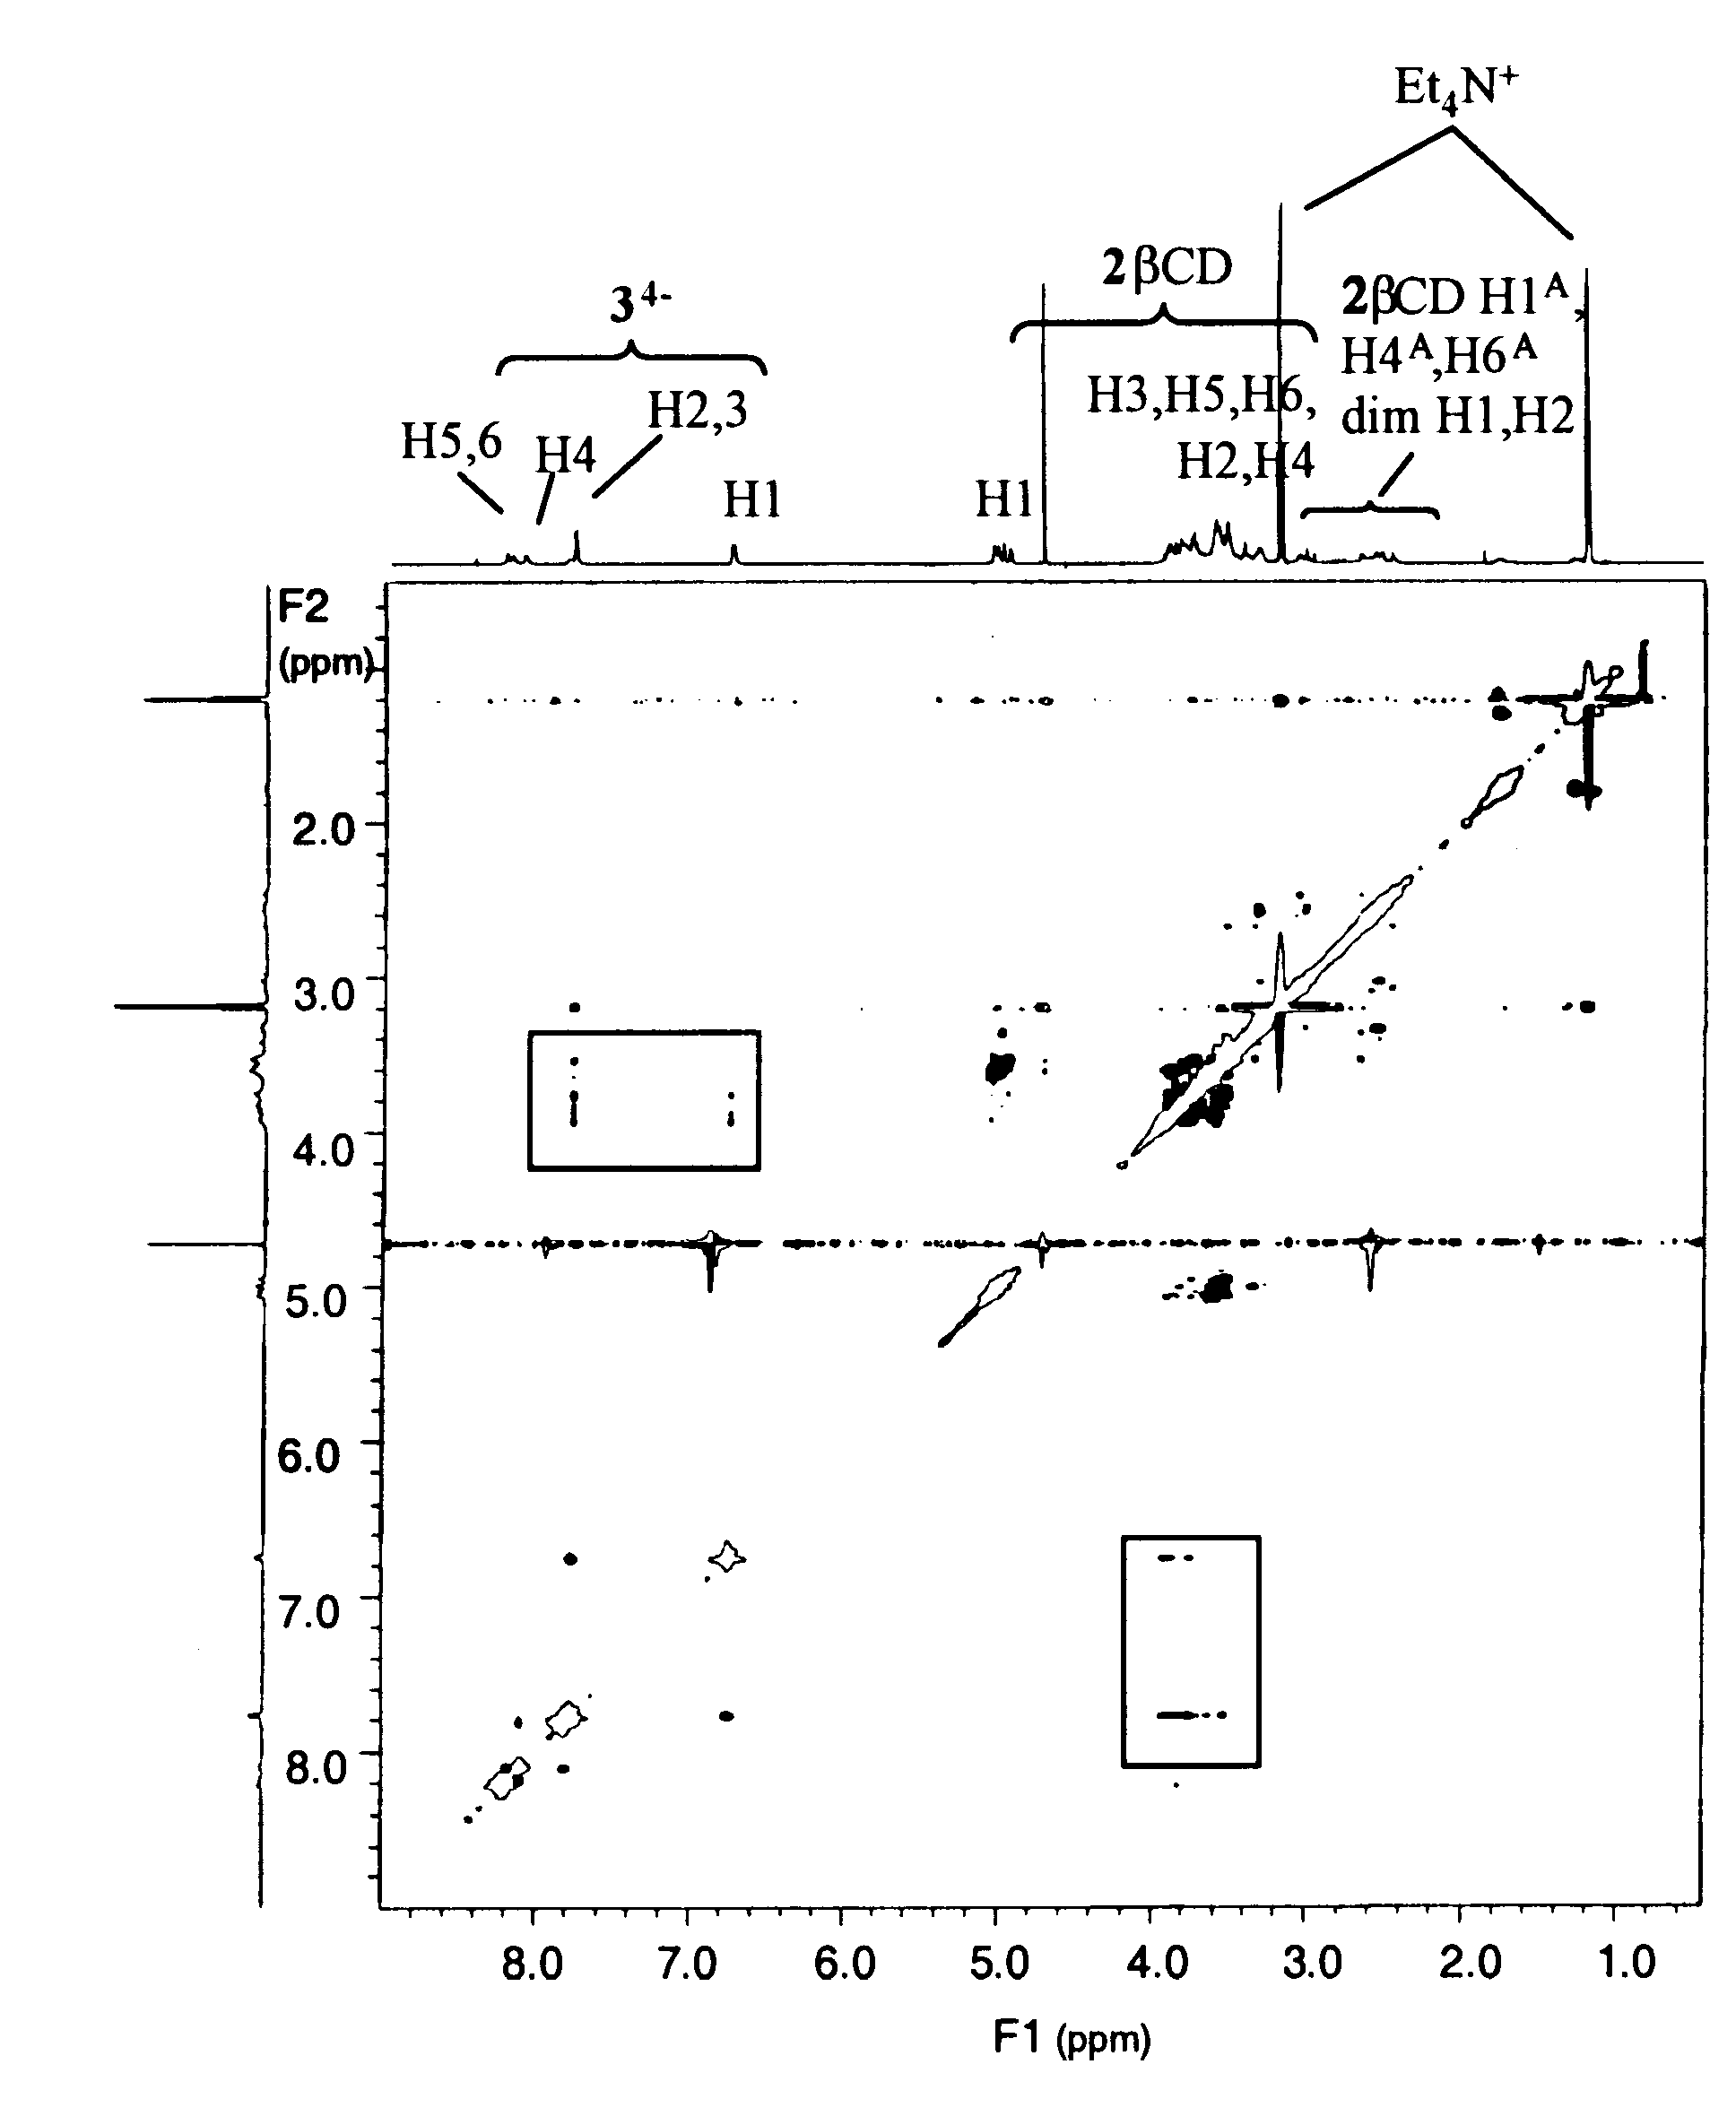


**Fig. S3**. The 2D 1H ROESY NMR (600 MHz) spectrum of a D2O solution 0.014 mol dm‑3 in **1** and **3**4- buffered at pD 10.0 by 0.1 mol dm-3 ND3/ND4Cl buffer at 298.2 K. The rectangles enclose cross-peaks arising from ROE interactions between the protons of **3**4- and the CD H3, H5 and H6 protons.

**
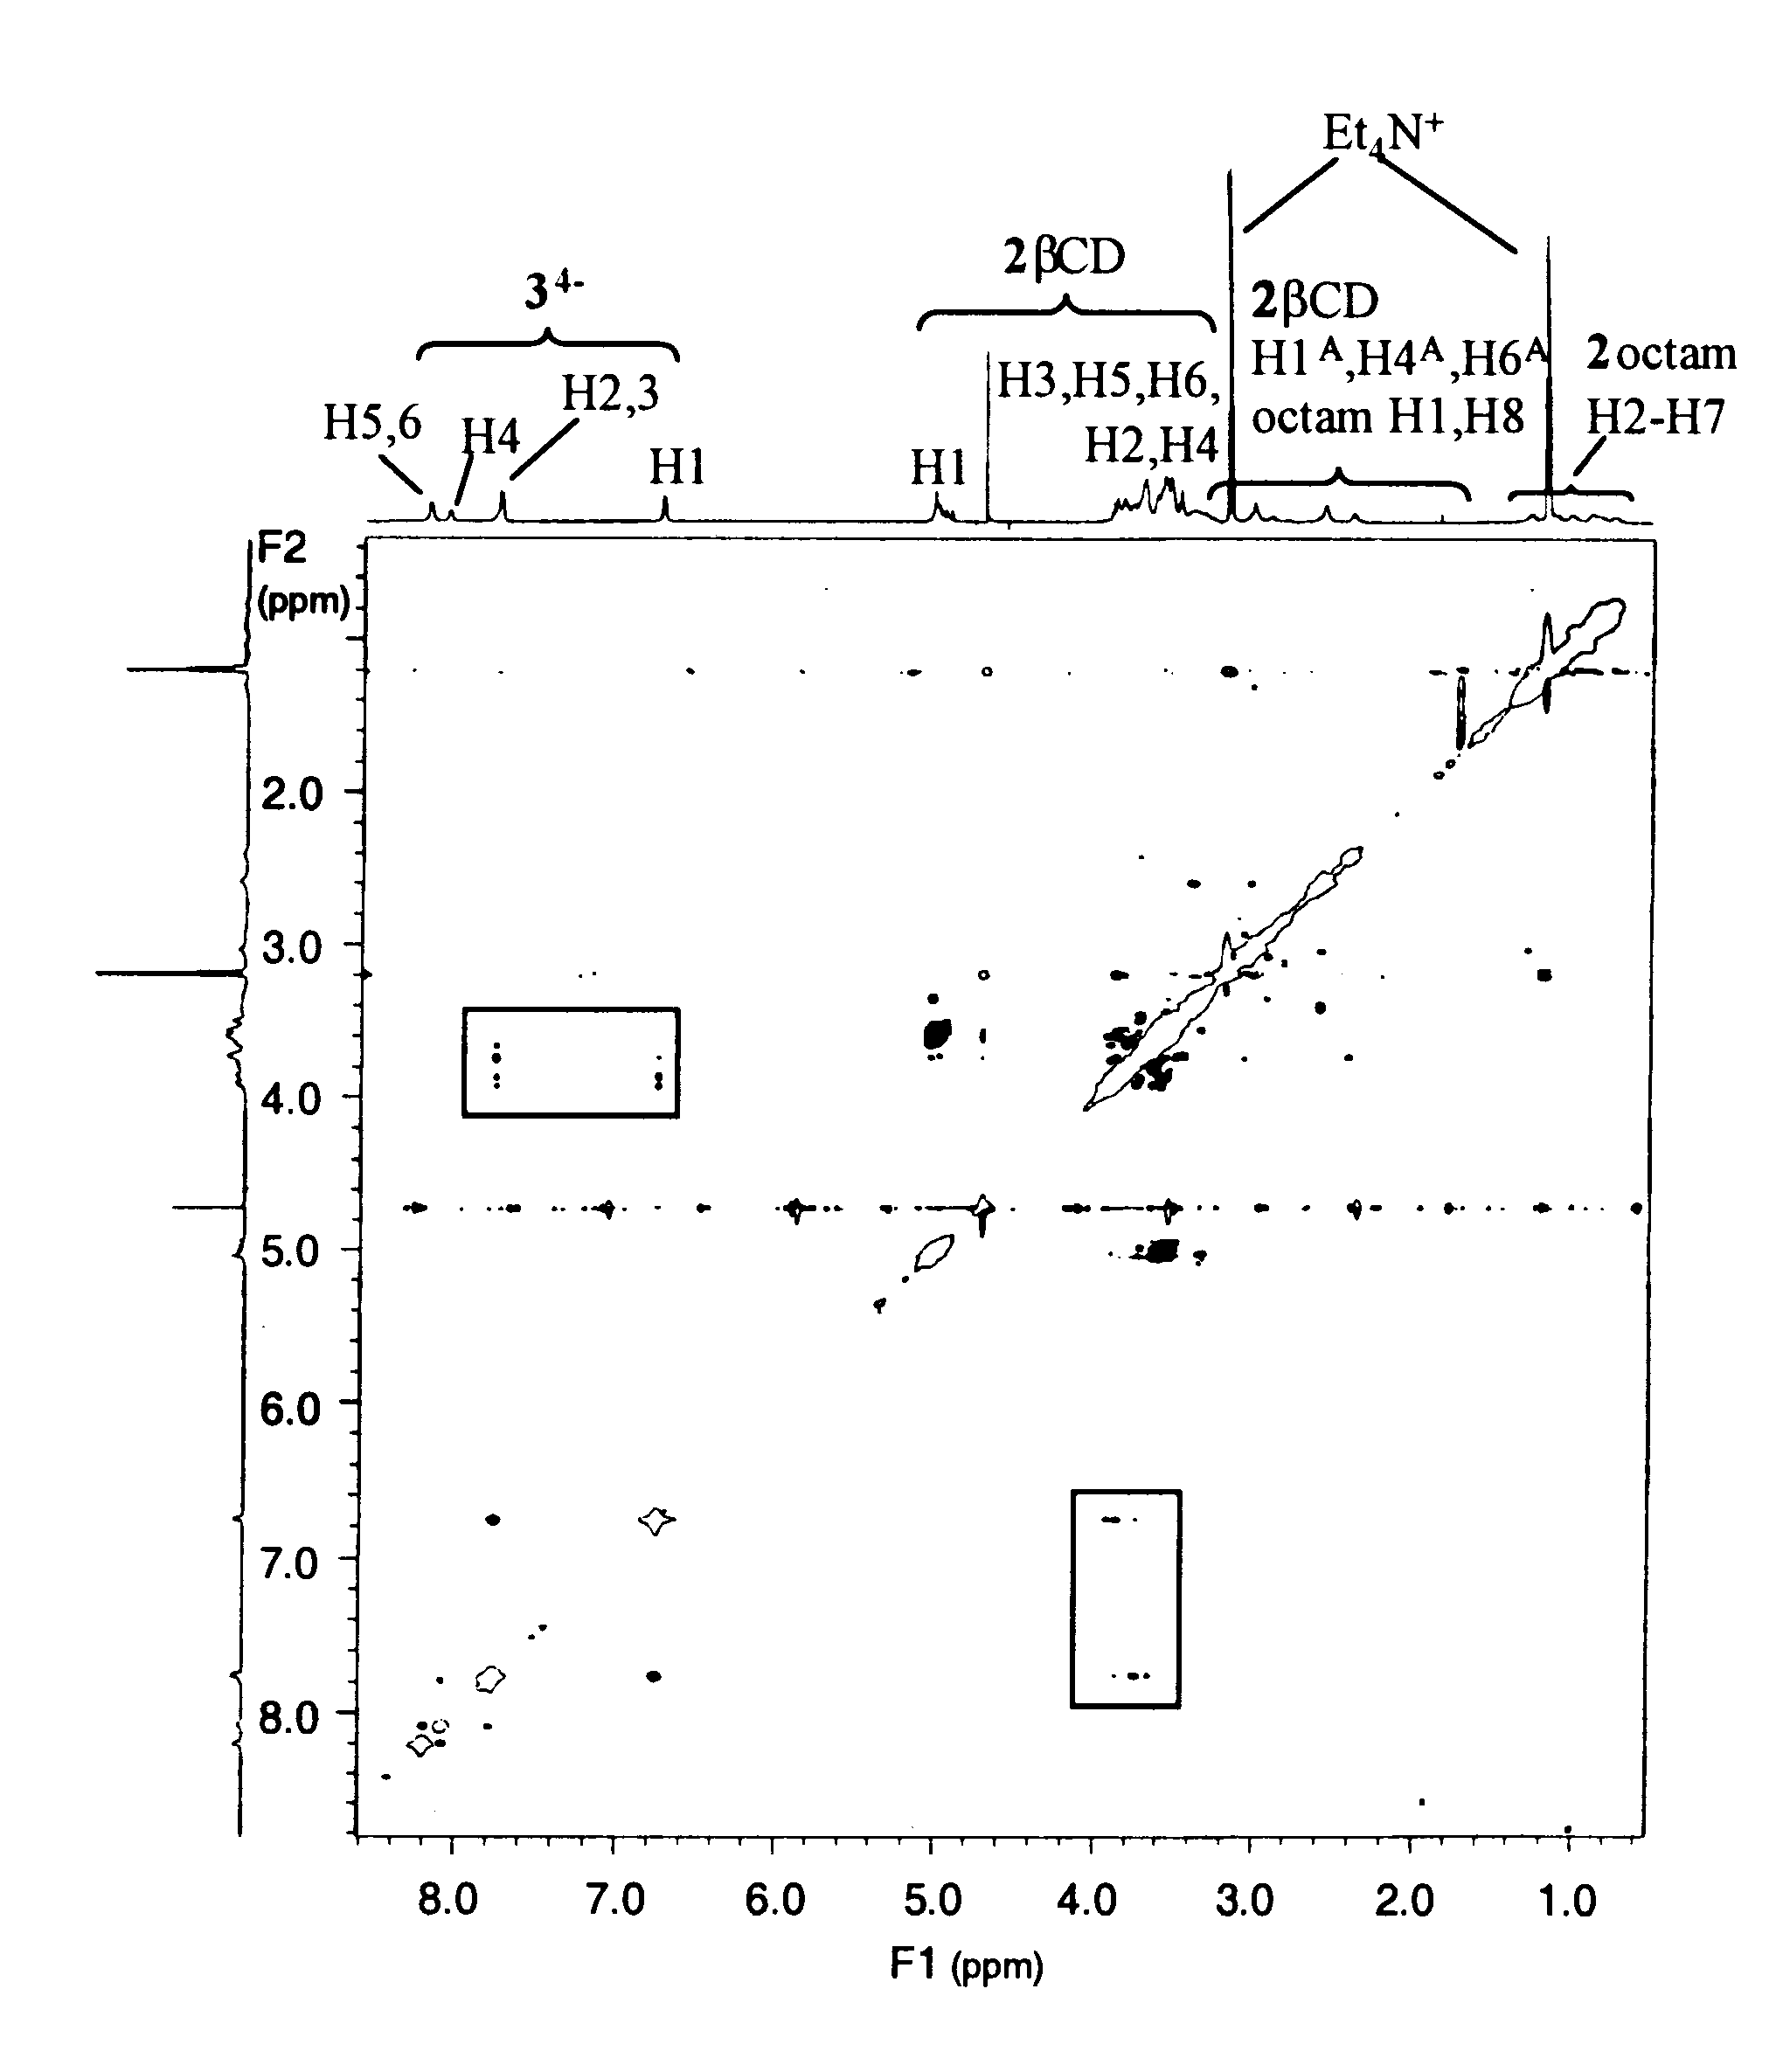
**

**Fig. S4**. The 2D 1H ROESY NMR (600 MHz) spectrum of a D2O solution 0.014 mol dm‑3 in **2** and **3**4- buffered at pD 10.0 by 0.1 mol dm-3 ND3/ND4Cl buffer at 298.2 K. The rectangles enclose cross-peaks arising from ROE interactions between the protons of **3**4- and the CD H3, H5 and H6 protons.

**
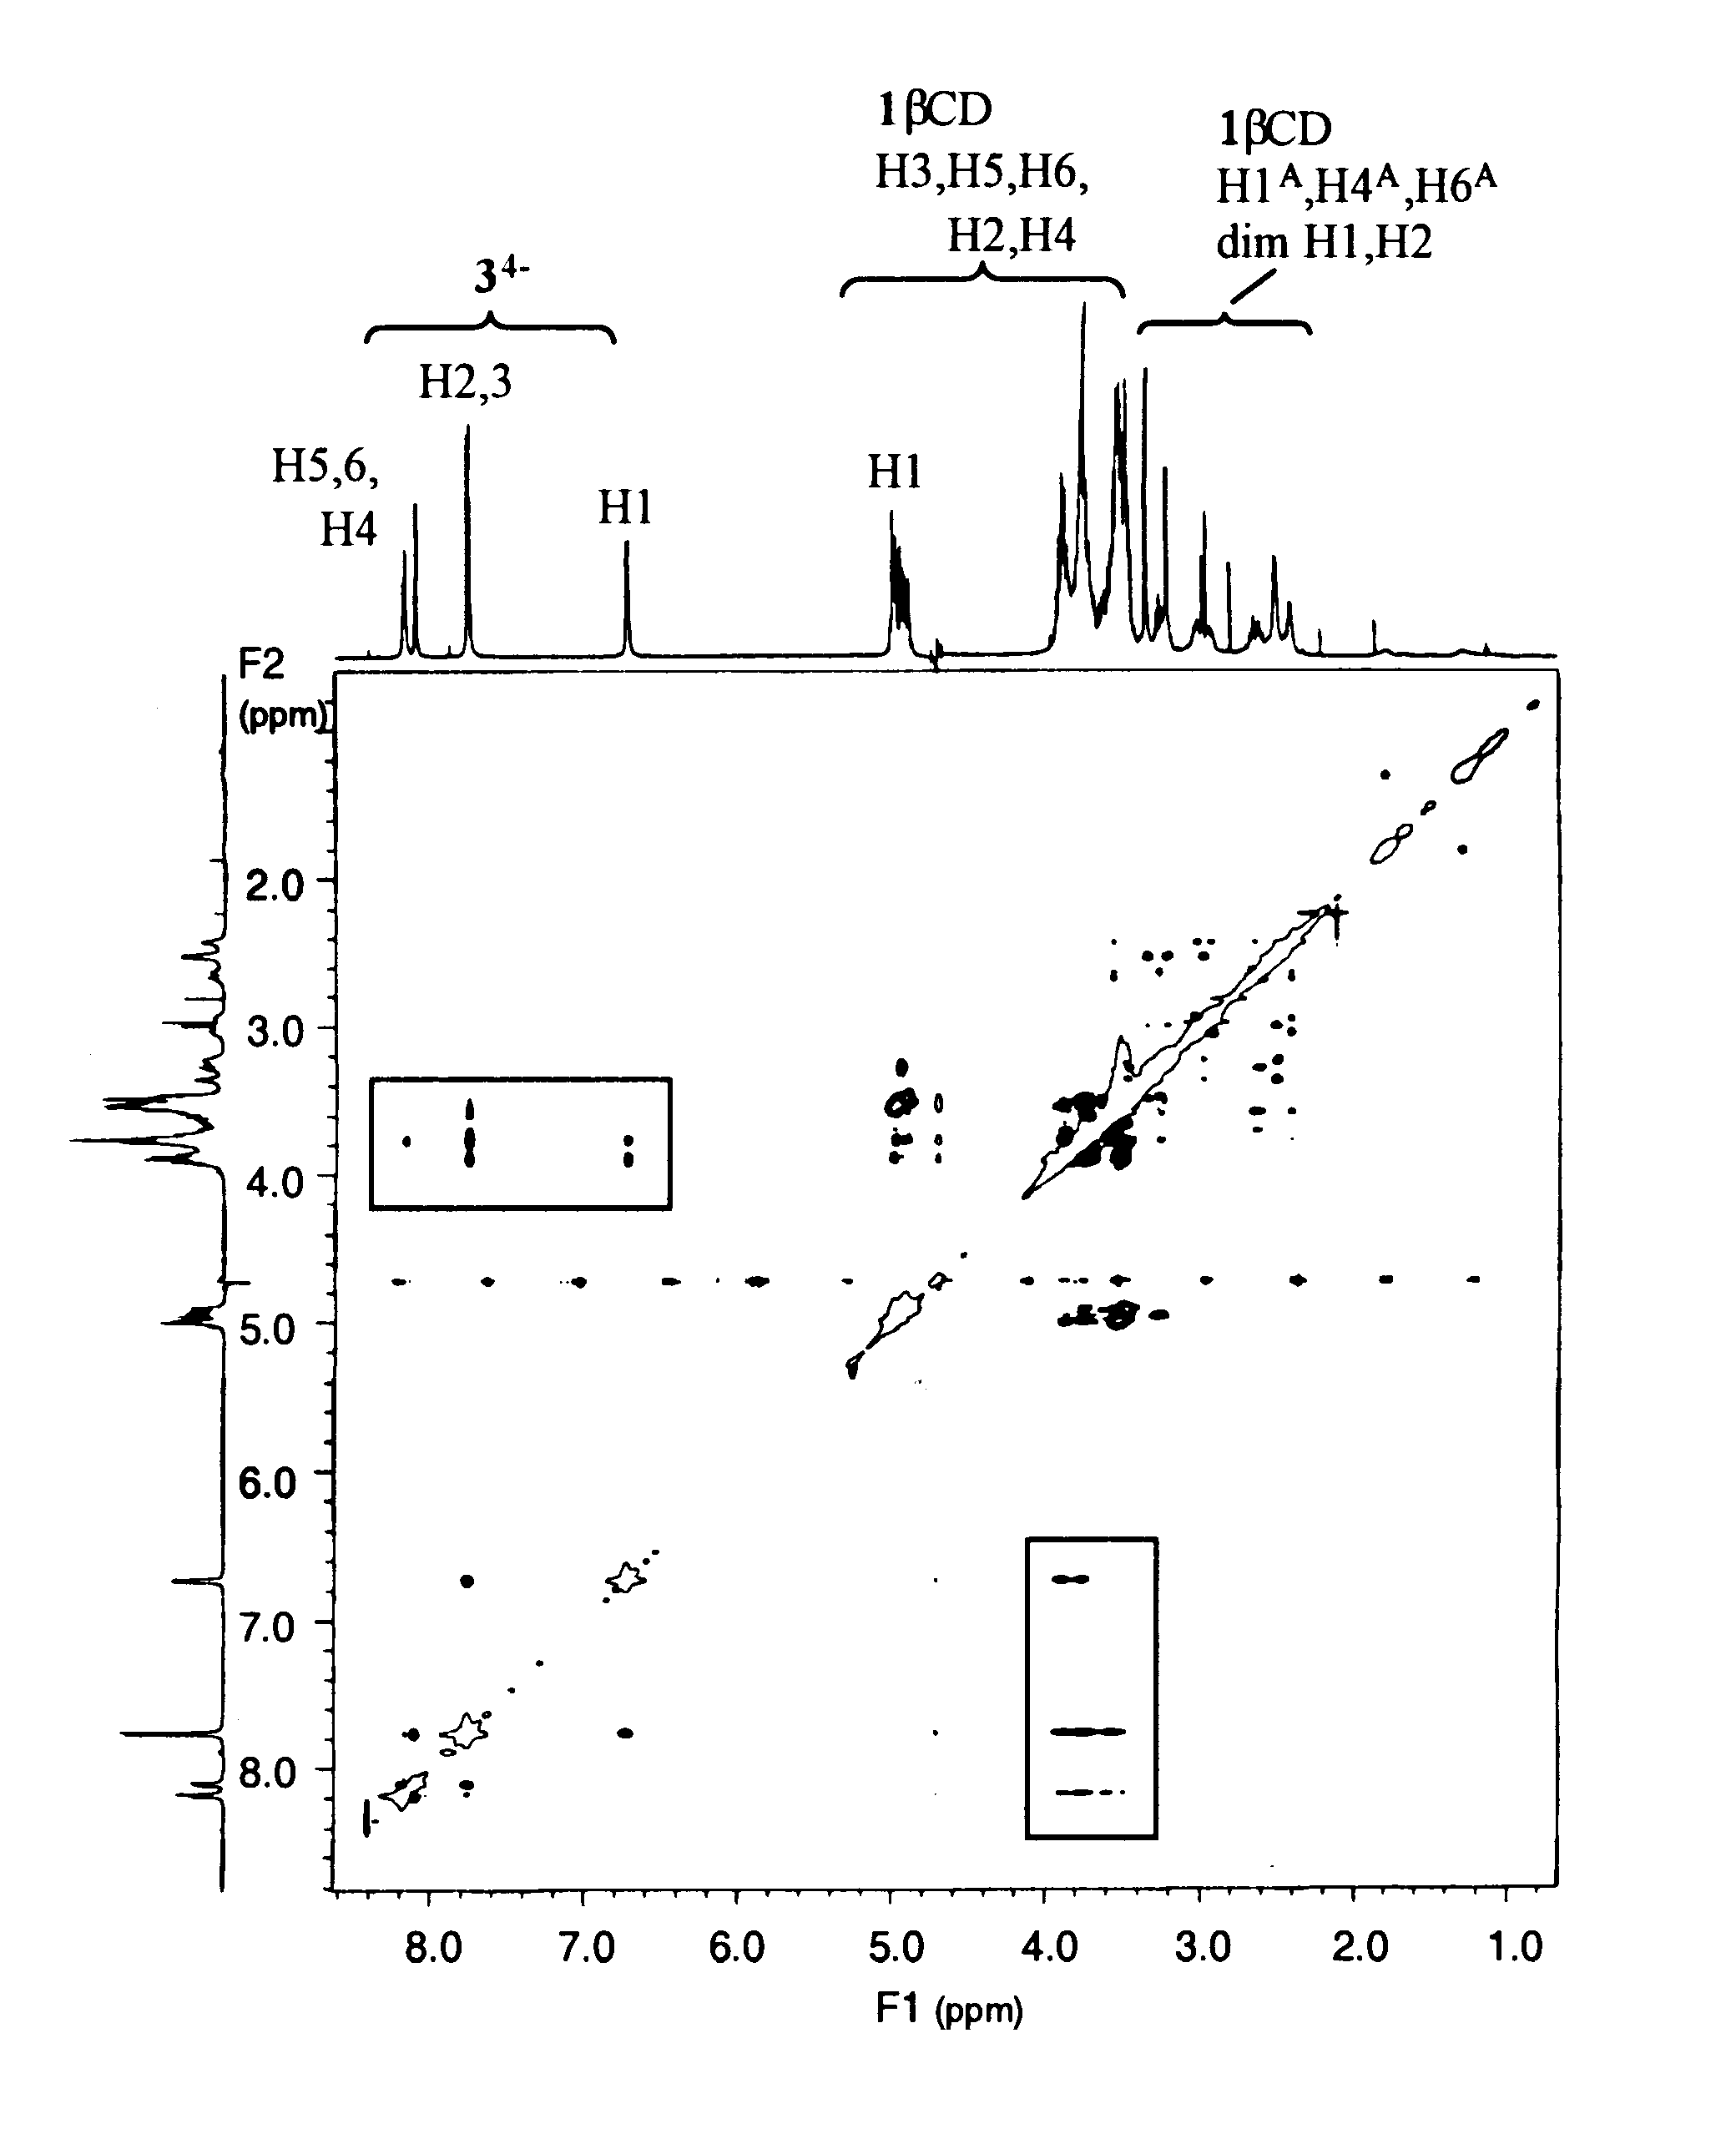
**

**Fig. S5**. The 2D 1H ROESY NMR (600 MHz) spectrum of a D2O solution 0.014 mol dm‑3 in **1** and **3**4- in 10-3 mol dm-3 NaOD and 0.1 mol dm-3 in NaClO4 (pD ≈ 11) at 298.2 K. The rectangles enclose the cross-peaks arising from ROE interactions between the protons of **3**4- and the CD H3, H5 and H6 protons.
